# Supplementary material for: Evidence for a Pro-inflammatory State of Macrophages from Non-obese Type-2 Diabetic Goto-Kakizaki Rats
Source: Preprints.org preprint supplement (doi:10.20944/preprints202407.1811.v1), 2024-07-24

**Figure S1.** Flow cytometry analysis of peritoneal cells of (A) CD68+ CD86+ and (B) CD68+ CD163+ cells of Goto-Kakizaki (GK) rats and (C) CD68+ CD86+ and (D) CD68+ CD163+ cells of Wistar (WT) rats.

**A**

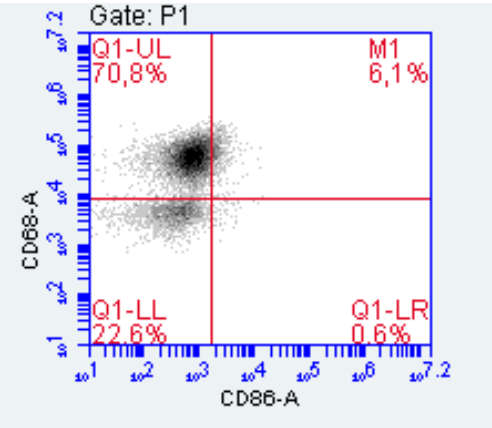

**B**

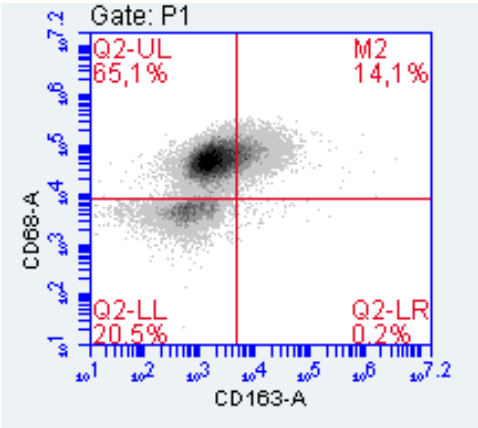

**C**

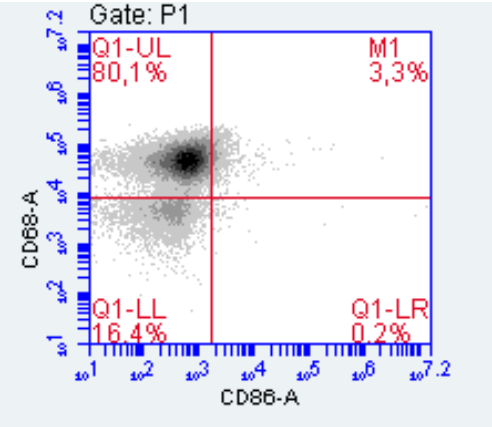

**D**

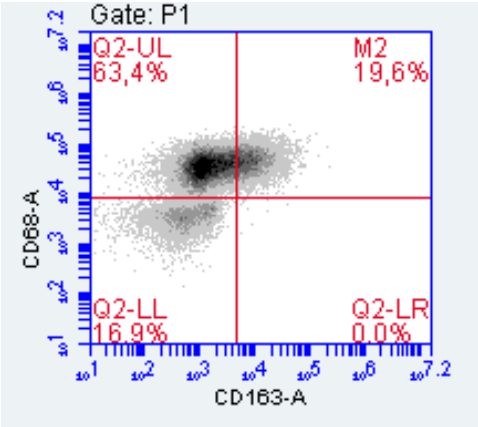

Supplement: Supplementary file 1 [file supplementary]
