# Supplementary material for: Evidence for a Pro-inflammatory State of Macrophages from Non-obese Type-2 Diabetic Goto-Kakizaki Rats
Source: Preprints.org preprint supplement (doi:10.20944/preprints202407.1811.v1), 2024-07-24
Supplement: Supplementary file 2 [file supplementary]

**Table S3.** Fasting blood glucose levels (mg/dL) of Wistar and Goto-Kakizaki rats. WT = Wistar; GK = Goto-Kakizaki. SEM = Standard error of the mean. Number of animals: WT = 8 and GK = 9 (weaning and eighteen weeks old); WT = 4 and GK = 5 (eight weeks).

| WT                                       |         |                 |                    | GK      |                 |                    |
|------------------------------------------|---------|-----------------|--------------------|---------|-----------------|--------------------|
| Fasting Glucose (mg/dL)                  |         |                 |                    |         |                 |                    |
| Animal number                            | Weaning | Eight weeks old | Eighteen weeks old | Weaning | Eight weeks old | Eighteen weeks old |
| 1                                        | 113     | 86              | 84                 | 146     | 165             | 125                |
| 2                                        | 112     | 92              | 96                 | 140     | 138             | 151                |
| 3                                        | 123     | 88              | 99                 | 135     | 178             | 145                |
| 4                                        | 114     | 93              | 89                 | 145     | 159             | 132                |
| 5                                        | 102     |                 | 105                | 159     | 148             | 117                |
| 6                                        | 117     |                 | 80                 | 133     |                 | 139                |
| 7                                        | 136     |                 | 81                 | 124     |                 | 121                |
| 8                                        | 98      |                 | 77                 | 133     |                 | 142                |
| 9                                        |         |                 |                    | 119     |                 | 103                |
| Mean (mg/dL)                             | 114.38  | 89.75           | 88.88              | 137.11  | 157.60          | 130.56             |
| Standard error of the mean (SEM) (mg/dL) | 4.18    | 1.65            | 10.13              | 4.03    | 6.89            | 5.13               |
