# Supplementary material for: Evidence for a Pro-inflammatory State of Macrophages from Non-obese Type-2 Diabetic Goto-Kakizaki Rats
Source: Preprints.org preprint supplement (doi:10.20944/preprints202407.1811.v1), 2024-07-24
Supplement: Supplementary file 3 [file supplementary]

**Table S4.** Percentage of M1 and M2 macrophages in the peritoneal cavity in Wistar and Goto-Kakizaki rats. WT = Wistar; GK = Goto-Kakizaki. SEM = Standard error of the mean. Number of animals: WT = 9 and GK = 8.

| WT                                   |        |        | GK     |        |
|--------------------------------------|--------|--------|--------|--------|
| Macrophage profile (%)               |        |        |        |        |
| Animal number                        | M1     | M2     | M1     | M2     |
| 1                                    | 4.40   | 30.72  | 8.47   | 15.56  |
| 2                                    | 4.09   | 26.88  | 6.54   | 17.61  |
| 3                                    | 3.90   | 22.90  | 6.34   | 20.14  |
| 4                                    | 4.20   | 18.26  | 6.93   | 22.32  |
| 5                                    | 3.42   | 25.72  | 5.91   | 15.53  |
| 6                                    | 3.73   | 21.97  | 4.75   | 17.74  |
| 7                                    | 4.00   | 15.26  | 5.00   | 12.70  |
| 8                                    | 3.70   | 18.32  | 5.15   | 11.88  |
| 9                                    | 2.98   | 15.72  |        |        |
| Mean (%)                             | 3.82   | 21.75  | 6.14   | 16.69  |
| Standard error of the mean (SEM) (%) | 0.0014 | 0.0180 | 0.0040 | 0.0120 |
