# Supplementary material for: Evidence for a Pro-inflammatory State of Macrophages from Non-obese Type-2 Diabetic Goto-Kakizaki Rats
Source: Preprints.org preprint supplement (doi:10.20944/preprints202407.1811.v1), 2024-07-24
Supplement: Supplementary file 4 [file supplementary]

**Table S1.** Weekly monitoring of average body mass and food consumption of Wistar and Goto-Kakizaki rats. SEM = Standard error of the mean; WT = Wistar; GK = Goto-Kakizaki. Number of animals: WT = 7–9 and GK = 9.

| Age<br>(weeks) | WT               |         |                                                      |                |                                                        |                   | GK               |         |                                                      |                |                                                     |                   |
|----------------|------------------|---------|------------------------------------------------------|----------------|--------------------------------------------------------|-------------------|------------------|---------|------------------------------------------------------|----------------|-----------------------------------------------------|-------------------|
|                | Body mass<br>(g) | SEM (g) | Daily intake<br>per animal in<br>one week<br>(g/day) | SEM<br>(g/day) | Daily intake<br>relative to body<br>mass<br>(mg/day/g) | SEM<br>(mg/day/g) | Body mass<br>(g) | SEM (g) | Daily intake<br>per animal in<br>one week<br>(g/day) | SEM<br>(g/day) | Daily intake<br>relative to body<br>mass (mg/day/g) | SEM<br>(mg/day/g) |
| 3              | 65.47            | 3.16    | 12.07                                                | 0.48           | 113.07                                                 | 2.45              | 29.36            | 2.04    | 7.22                                                 | 0.19           | 133.95                                              | 5.35              |
| 4              | 107.04           | 4.59    | 22.07                                                | 0.38           | 122.91                                                 | 1.57              | 54.60            | 2.64    | 11.43                                                | 0.13           | 127.00                                              | 5.06              |
| 5              | 176.09           | 6.23    | 28.56                                                | 0.29           | 120.42                                                 | 1.56              | 91.18            | 3.96    | 15.94                                                | 0.09           | 129.62                                              | 5.13              |
| 6              | 233.20           | 5.70    | 30.43                                                | 0.18           | 102.09                                                 | 1.02              | 124.60           | 5.31    | 18.00                                                | 0.09           | 107.63                                              | 3.51              |
| 7              | 298.75           | 2.37    | 33.90                                                | 0.26           | 97.96                                                  | 1.78              | 168.78           | 5.89    | 22.51                                                | 0.36           | 107.93                                              | 3.18              |
| 8              | 351.28           | 2.92    | 34.10                                                | 0.10           | 88.85                                                  | 1.30              | 209.96           | 6.80    | 21.13                                                | 0.26           | 93.85                                               | 2.47              |
| 9              | 388.85           | 3.25    | 31.17                                                | 0.36           | 72.44                                                  | 1.41              | 226.44           | 6.58    | 19.24                                                | 0.19           | 79.00                                               | 1.95              |
| 10             | 423.03           | 1.46    | 34.68                                                | 0.33           | 76.56                                                  | 1.61              | 244.78           | 6.46    | 20.13                                                | 0.10           | 77.09                                               | 1.64              |
| 11             | 460.10           | 3.74    | 34.60                                                | 0.19           | 71.56                                                  | 0.38              | 262.16           | 5.95    | 20.77                                                | 0.24           | 74.48                                               | 1.59              |
| 12             | 486.75           | 3.90    | 32.79                                                | 0.11           | 65.17                                                  | 0.95              | 279.84           | 6.71    | 19.73                                                | 0.30           | 66.44                                               | 1.34              |
| 13             | 503.87           | 6.16    | 32.34                                                | 0.30           | 61.86                                                  | 1.05              | 297.76           | 6.42    | 20.48                                                | 0.25           | 66.76                                               | 1.24              |
| 14             | 523.49           | 5.18    | 33.60                                                | 0.28           | 62.30                                                  | 0.18              | 307.49           | 6.53    | 20.24                                                | 0.26           | 64.33                                               | 1.33              |
| 15             | 547.16           | 5.51    | 30.04                                                | 0.70           | 54.28                                                  | 0.46              | 315.42           | 5.99    | 19.51                                                | 0.29           | 60.83                                               | 1.42              |
| 16             | 553.69           | 13.10   | 28.13                                                | 0.91           | 51.14                                                  | 1.78              | 321.60           | 5.49    | 18.48                                                | 0.48           | 58.05                                               | 1.39              |
| 17             | 550.58           | 6.08    | 35.15                                                | 0.29           | 60.54                                                  | 0.60              | 318.62           | 5.48    | 21.69                                                | 0.39           | 65.33                                               | 1.78              |
| 18             | 580.91           | 7.08    | 37.59                                                | 1.77           | 63.45                                                  | 2.87              | 332.96           | 6.24    | 20.44                                                | 0.67           | 60.65                                               | 2.36              |
