# Supplementary material for: Evidence for a Pro-inflammatory State of Macrophages from Non-obese Type-2 Diabetic Goto-Kakizaki Rats
Source: Preprints.org preprint supplement (doi:10.20944/preprints202407.1811.v1), 2024-07-24
Supplement: Supplementary file 5 [file supplementary]

**Table S5.** Production of reactive oxygen species (ROS) by macrophages during 30 minutes with and without phorbol myristate acetate (PMA) stimulation in Wistar and Goto-Kakizaki rats. RU = Relative Unit. WT = Wistar; GK = Goto-Kakizaki. SEM = Standard error of the mean. Number of animals: WT = 7 and GK = 8.

|                                       | WT                  |        | GK    |        |
|---------------------------------------|---------------------|--------|-------|--------|
|                                       | ROS production (RU) |        |       |        |
| Animal number                         | Basal               | PMA    | Basal | PMA    |
| 1                                     | 1.23                | 40.09  | 1.11  | 111.11 |
| 2                                     | 1.19                | 105.70 | 1.03  | 88.81  |
| 3                                     | 0.54                | 51.92  | 0.73  | 65.00  |
| 4                                     | 4.36                | 150.72 | 0.77  | 107.35 |
| 5                                     | 3.15                | 108.84 | 0.72  | 42.04  |
| 6                                     | 9.81                | 175.93 | 1.91  | 120.38 |
| 7                                     | 5.22                | 295.16 | 0.22  | 31.81  |
| 8                                     |                     |        | 1.39  | 140.01 |
| Mean (RU)                             | 3.64                | 132.62 | 0.98  | 88.31  |
| Standard error of the mean (SEM) (RU) | 1.22                | 32.73  | 0.18  | 13.67  |
