# Supplementary material for: Evidence for a Pro-inflammatory State of Macrophages from Non-obese Type-2 Diabetic Goto-Kakizaki Rats
Source: Preprints.org preprint supplement (doi:10.20944/preprints202407.1811.v1), 2024-07-24
Supplement: Supplementary file 6 [file supplementary]

**Table S2.** Nasal–anal length (cm) of eighteen weeks old Wistar and Goto-Kakizaki rats. SEM = Standard error of the mean. WT = Wistar; GK = Goto-Kakizaki. N=9.

| WT                                      |                        | GK                     |
|-----------------------------------------|------------------------|------------------------|
| Animal number                           | Nasal–anal length (cm) | Nasal–anal length (cm) |
| 1                                       | 26.5                   | 23.5                   |
| 2                                       | 26.7                   | 23.5                   |
| 3                                       | 26.5                   | 23.0                   |
| 4                                       | 26.5                   | 22.0                   |
| 5                                       | 26.6                   | 21.3                   |
| 6                                       | 25.5                   | 22.0                   |
| 7                                       | 26.0                   | 23.0                   |
| 8                                       | 26.5                   | 23.0                   |
| 9                                       | 26.5                   | 23.0                   |
| Mean (g)                                | 26.37                  | 22.70                  |
| Standard error of the mean (SEM)<br>(g) | 0.13                   | 0.25                   |
