# Supplementary material for: Evidence for a Pro-inflammatory State of Macrophages from Non-obese Type-2 Diabetic Goto-Kakizaki Rats
Source: Preprints.org preprint supplement (doi:10.20944/preprints202407.1811.v1), 2024-07-24
Supplement: Supplementary file 7 [file supplementary]

**Table S6.** Concentration of cytokines in the supernatant from peritoneal macrophages from Wistar (WT) and Goto-Kakizaki (GK) rats cultured for 6 hours in basal or LPS-stimulated condition

| Cytokines                                |               |        |               |               |      |        |       |                        |               |        |        |               |       |         |               |        |              |          |  |
|------------------------------------------|---------------|--------|---------------|---------------|------|--------|-------|------------------------|---------------|--------|--------|---------------|-------|---------|---------------|--------|--------------|----------|--|
| Basal conditions (pg/mL)                 |               |        |               |               |      |        |       | LPS Stimulated (pg/mL) |               |        |        |               |       |         |               |        |              |          |  |
|                                          | Animal number | MCP-1  | IL-1 $\alpha$ | TNF- $\alpha$ | IL-6 | CXCL-1 | IL-18 | GM-CSF                 | TNF- $\alpha$ | MCP-1  | CXCL-1 | IFN- $\gamma$ | IL-18 | IL-6    | IL-1 $\alpha$ | IL-17A | IL-1 $\beta$ | IL-12p70 |  |
| WT                                       | 1             | 8,550  | 8.07          | 12.6          | 26.8 | 472    | 109   | 190                    | 6,581         | 30,207 | 17,189 | 154           | 100   | 32,337  | 850           | 14.9   | 12.7         | 171      |  |
|                                          | 2             | 14,469 | 12.0          | 70.1          | 47.5 | 1,904  | 55.5  | 150                    | 4,238         | 21,821 | 15,385 | 32.5          | 89.4  | 109,556 | 498           | 4.56   | 4.12         | 331      |  |
|                                          | 3             | 5,095  | 7.36          | 264           | 61.6 | 3,703  | 47.6  | 225                    | 216           | 30,223 | 278    | 278           | 619   | 31,827  | 668           | 7.73   | 6.56         | 60.7     |  |
|                                          | 4             | 9,408  | 9.82          | 32.6          | 35.0 | 847    | 73.1  | 150                    | 5,869         | 12,519 | 498    | 73.0          | 205   | 57,895  | 602           | 4.84   | 30.8         | 104      |  |
|                                          | 5             | 8,555  | 12.4          | 81.7          | 56.0 | 2,112  | 49.9  | 206                    | 5,116         | 17,495 | 88.0   | 30.0          | 245   | 29,009  | 610           |        | 28.3         |          |  |
|                                          | 6             | 5,263  |               | 161           | 57.2 | 3,367  | 67.5  | 200                    | 3,482         | 14,683 | 11,851 | 122           | 113   |         | 510           |        | 28.9         |          |  |
|                                          | 7             | 11,784 |               | 242           | 83.3 | 4,552  | 70.8  | 164                    | 5,538         | 11,251 | 20,506 | 21.9          | 257   |         | 1,084         |        | 22.3         |          |  |
|                                          | 8             | 23,852 |               | 56.1          | 59.0 | 3,167  |       | 122                    | 4,978         | 20,604 | 440    |               |       |         | 805           |        | 14.2         |          |  |
|                                          | 9             |        |               |               |      |        |       |                        | 5,476         | 33,054 | 32,006 |               |       |         |               |        |              | 34.8     |  |
| Mean (pg/mL)                             |               | 10,872 | 9.93          | 115           | 53.3 | 2,516  | 67.6  | 176                    | 4,610         | 21,317 | 10,916 | 102           | 233   | 52,125  | 704           | 8.01   | 20.3         | 167      |  |
| Standard error of the mean (SEM) (pg/mL) |               | 2,155  | 1.01          | 33.9          | 6.12 | 504    | 7.89  | 12.3                   | 626           | 2,724  | 3,811  | 34.9          | 69.6  | 15,280  | 70.3          | 2.41   | 3.74         | 59.3     |  |
| GK                                       | 1             | 4,436  | 243           | 21.1          | 18.6 | 499    | 84.9  | 285                    | 19,967        | 26,962 | 1,178  | 175           | 574   | 25,993  | 1,232         | 16.0   | 38.1         | 188      |  |
|                                          | 2             | 28,725 | 10.8          | 1,504         | 20.0 | 10,613 | 167   | 211                    | 14,396        | 39,232 | 13,914 | 467           | 280   | 13,880  | 391           | 14.3   | 37.8         | 158      |  |
|                                          | 3             | 4,866  | 58.0          | 83.0          | 69.6 | 668    | 90.3  | 395                    | 18,059        | 28,498 | 1,011  | 879           | 109   | 85,581  | 767           | 9.74   | 15.4         | 36.4     |  |
|                                          | 4             | 76,123 | 20.6          | 840           | 44.8 | 6,215  | 28.7  | 227                    | 17,767        | 51,644 | 20,696 | 32.3          | 117   | 8,049   | 504           | 8.65   | 13.5         | 108      |  |
|                                          | 5             | 6,529  | 15.9          | 175           | 44.6 | 1,932  | 117   | 330                    | 5,908         | 25,129 | 388    | 152           | 139   | 23,893  | 314           | 5.31   | 12.0         | 168      |  |
|                                          | 6             |        | 161           | 234           | 90.9 | 3,07   | 30.0  |                        |               | 16,51  |        | 276           |       | 58,303  | 455           |        | 21.4         | 200      |  |
|                                          | 7             |        |               | 857           |      | 10,839 | 327   |                        |               | 34,625 |        |               |       |         |               |        |              |          |  |
| Mean (pg/mL)                             |               | 24,136 | 85.0          | 531           | 48.1 | 4,834  | 121   | 290                    | 15,219        | 31,800 | 7,437  | 330           | 244   | 35,950  | 610           | 10.8   | 23.0         | 143      |  |
| Standard error of the mean (SEM) (pg/mL) |               | 13,772 | 39.1          | 208           | 11.5 | 1,684  | 38.9  | 33.8                   | 2,495         | 4,281  | 4,171  | 125           | 88.2  | 12,211  | 139           | 1.94   | 4.90         | 24.9     |  |
